# Supplementary material for: Genetic and Biological Characteristics of Duck-Origin H4N6 Avian Influenza Virus Isolated in China in 2022
Source: MDPI journal article supplement (doi:10.3390/v16020207), 2024-01-30
Supplement: s1 [file s1]

**Table S1.** Basic information on sampling.

| Province | City     | Number of farms | Breed                     | Collection date | Samples | Influenza isolates |                     | Number of O or C or E samples positive for |                |
|----------|----------|-----------------|---------------------------|-----------------|---------|--------------------|---------------------|--------------------------------------------|----------------|
|          |          |                 |                           |                 |         | (O or C or E)*     | Isolation rates (%) | H4N6                                       | Other subtypes |
| Jiangxi  | Nanchang | 7               | white-striped duck;       | Jan 2022        | 53      | 38, 0, 15(1)       | 1.9                 | 1                                          | 0              |
|          | Jiujiang | 12              | white-striped green duck; |                 | 60      | 38, 3, 19          | 0                   | 0                                          | 0              |
|          | Shangrao | 1               | mallard                   |                 | 17      | 15(2), 0, 2        | 11.8                | 2                                          | 0              |
|          | Total    | 19              |                           |                 | 129     |                    | 2.3                 | 3                                          | 0              |

\*O, oropharyngeal swabs; C, cloacal swabs; E, environment swabs. Values of brackets refer to the positive swabs detected.

**Table S2.** The virus strains with the highest homology.

| Strains                                | Gene | Most homologous strain                               | Homology (%) | GenBank Accession Number |
|----------------------------------------|------|------------------------------------------------------|--------------|--------------------------|
| A/environment/Jiangxi/F0114/2022(H4N6) | PB2  | A/Pink-footed goose/South Korea/19DC-44/2019 (H11N2) | 99.13%       | OQ296901                 |
|                                        | PB1  | A/Eurasian_Curlew/China/CZ322(7)/2019(H3N8)          | 98.80%       | MT835198                 |
|                                        | PA   | A/Bean Goose/South Korea/KNU2021-26/2021(H6N2)       | 99.66%       | ON564807                 |
|                                        | HA   | A/spot-billed duck/South Korea/JB32-105/2019(H4N2)   | 98.97%       | MW494119                 |
|                                        | NP   | A/duck/Mongolia/667/2019(H3N8)                       | 99.07%       | ON514004                 |
|                                        | NA   | A/unidentified_bird/Saga/NIES889/2022(H4N6)          | 99.15%       | LC764372                 |
|                                        | M    | A/duck/Mongolia/961/2019(H3N8)                       | 99.21%       | MT020281                 |
|                                        | NS   | A/Wild duck/South Korea/KNU2020-31/2020(H1N1)        | 99.49%       | OK217178                 |
| A/duck/Jiangxi/F011502/2022(H4N6)      | PB2  | A/Eurasian_Curlew/China/CZ322(7)/2019(H3N8)          | 98.85%       | ON513977                 |
|                                        | PB1  | A/mallard/South Korea/JB21-22/2019(H4N6)             | 98.50%       | MT835198                 |
|                                        | PA   | A/Bean Goose/South Korea/KNU2021-26/2021(H6N2)       | 99.72%       | ON564807                 |
|                                        | HA   | A/spot-billed duck/South Korea/JB32-105/2019(H4N2)   | 99.06%       | MW494119                 |
|                                        | NP   | A/duck/Mongolia/667/2019(H3N8)                       | 99.13%       | ON514004                 |
|                                        | NA   | A/duck/Bangladesh/41481/2019(H4N6)                   | 98.23%       | MW466445                 |
|                                        | M    | A/duck/Mongolia/961/2019(H3N8)                       | 99.19%       | MT020281                 |
|                                        | NS   | Wild duck/South Korea/KNU2020-31/2020(H1N1)          | 99.41%       | OK217178                 |
| A/duck/Jiangxi/F011501/2022(H4N6)      | PB2  | A/Mallard/South Korea/KNU2021-49/2021(H7N7)          | 98.58%       | ON505898                 |
|                                        | PB1  | A/duck/Vietnam/HN5959/2019(H4N6)                     | 98.99%       | MW935118                 |
|                                        | PA   | A/wild duck/South Korea/KNU18-106/2018(H7N7)         | 98.59%       | MN483210                 |
|                                        | HA   | A/spot-billed duck/South Korea/JB32-105/2019(H4N2)   | 98.73%       | MW494119                 |
|                                        | NP   | A/duck/Mongolia/667/2019(H3N8)                       | 98.65%       | MT020231                 |
|                                        | NA   | A/duck/Bangladesh/41481/2019(H4N6)                   | 98.31%       | MW466445                 |
|                                        | M    | A/duck/Mongolia/961/2019(H3N8)                       | 99.12%       | MT020281                 |
|                                        | NS   | Wild duck/South Korea/KNU2020-31/2020(H1N1)          | 99.48        | OK217178                 |
